# Supplementary material for: Genetic or siRNA inhibition of MBD2 attenuates the UUO- and I/R-induced renal fibrosis via downregulation of EGR1
Source: PubMed Central journal article supplement — Mol Ther Nucleic Acids. 2022 Feb 28;28:77–86. doi: 10.1016/j.omtn.2022.02.015 (PMC8933641; doi:10.1016/j.omtn.2022.02.015), 2022-02-28
Supplement: mmc1.pdf [file mmc1.pdf]

**Supplemental information**

**Genetic or siRNA inhibition of MBD2  
attenuates the UUO- and I/R-induced renal  
fibrosis via downregulation of EGR1**

**Kai Ai, Xiaozhou Li, Pan Zhang, Jian Pan, Huiling Li, Zhibiao He, Hongliang Zhang, Lei Yi, Ye Kang, Yinhuai Wang, Junxiang Chen, Yijian Li, Xudong Xiang, Xiangping Chai, and Dongshan Zhang**

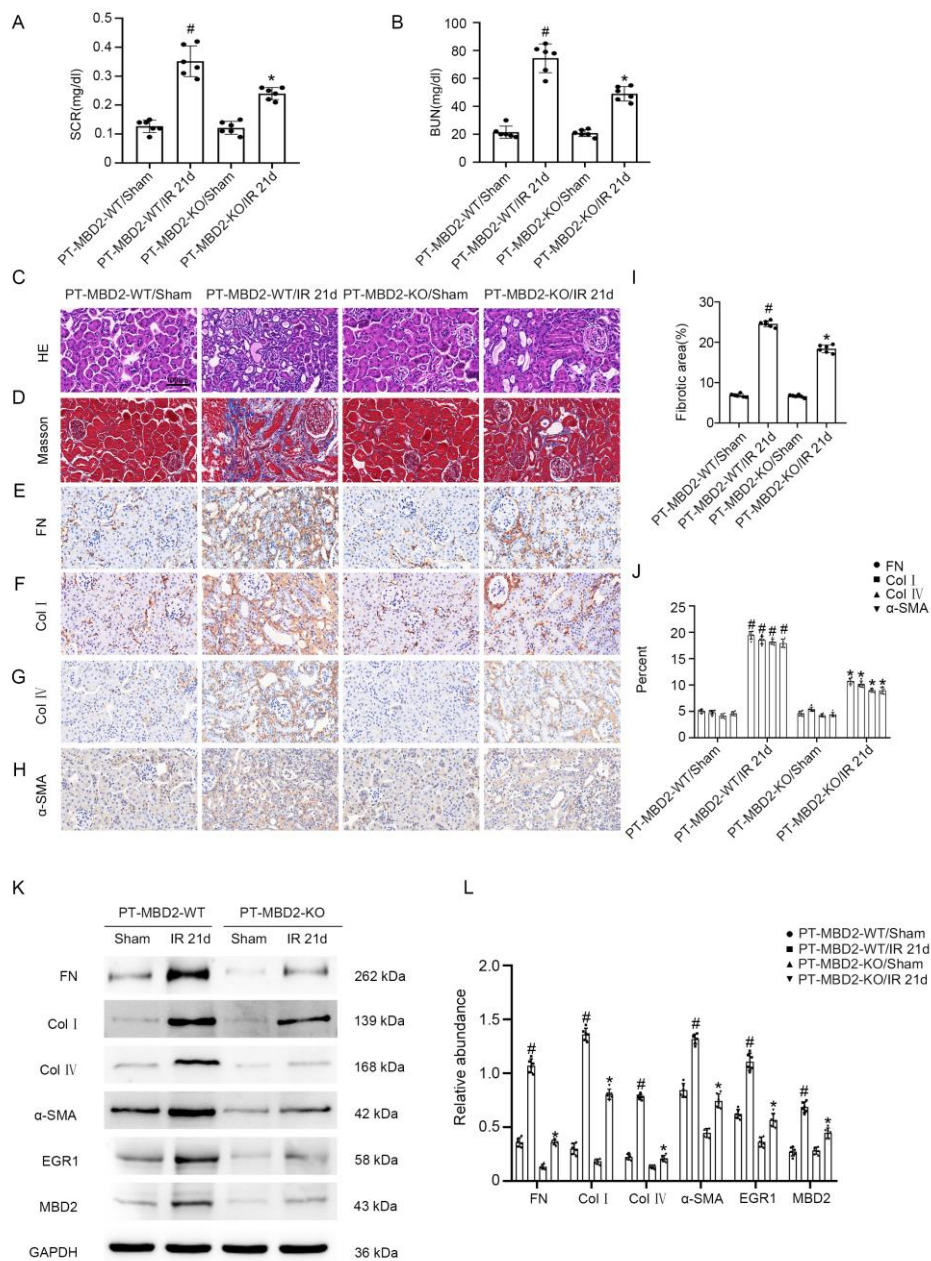

**Supplemental Figure 1. PT-MBD2-KO mice attenuated IR-induced renal fibrosis.** The littermate mice of the PT-MBD2-WT and PT-MBD2-KO were subjected to 28 minutes of bilateral renal ischemia followed by 21 days of reperfusion. (A) Blood SCR level of mice. (B) Blood BUN level of mice. (C) Representative hematoxylin and eosin staining. (D) Masson trichrome staining shows interstitial collagen deposition (blue). (E-H) Immunohistochemistry of FN, Col I&IV, and α-SMA. (I) Quantify tubulointerstitial fibrosis in the kidney cortex. (J) Quantification of immunohistochemistry staining. (K) Representative immunoblots for the expression of FN, Col I&IV, α-SMA, EGR1 and GAPDH. (L) Densitometry analysis of proteins signals, and normalized to internal control of GAPDH. Data are expressed as means ± sd (n=6). # P<0.05 versus sham group. \* P<0.05 versus PT-MBD2-WT IR group. Original magnification, x400. Scale Bar: 100µm.

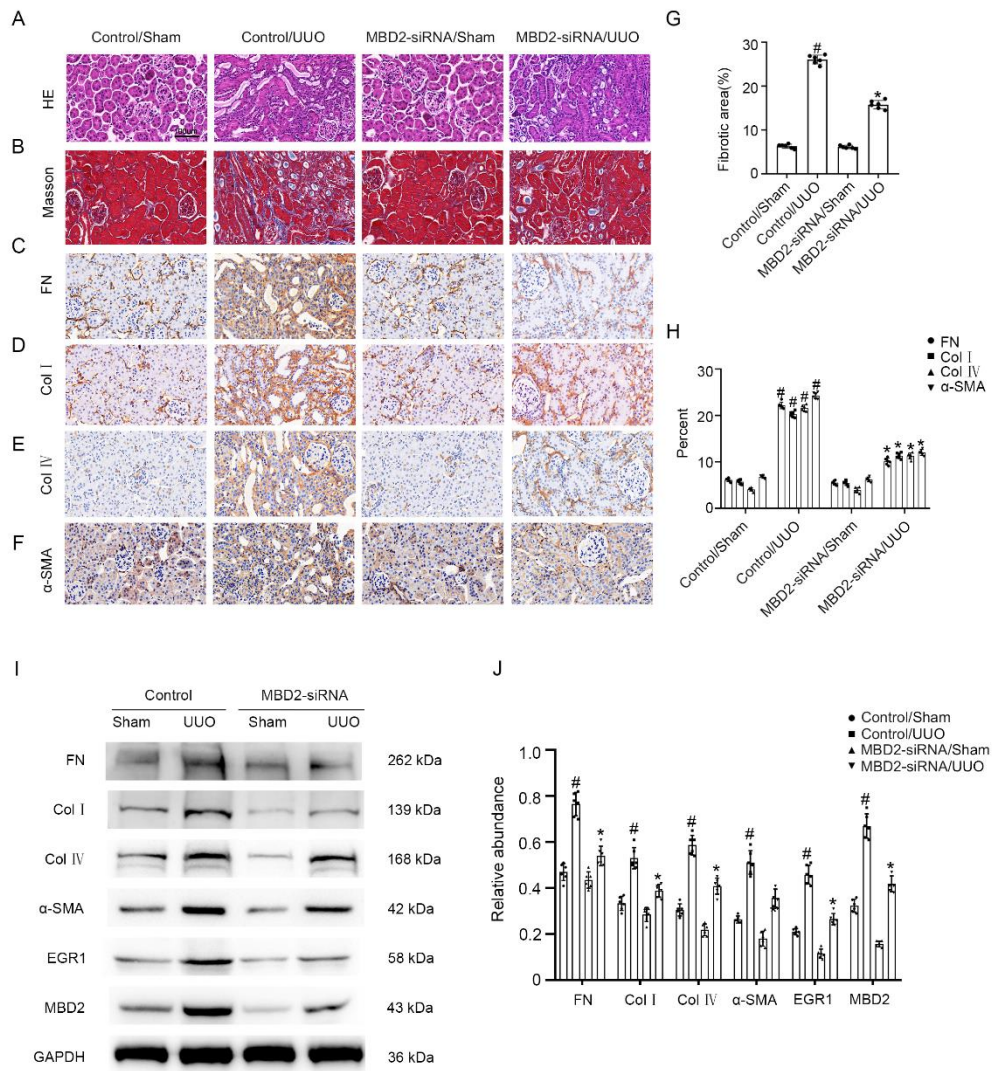

**Supplemental Figure 2. MBD2 siRNA attenuated UUO-induced renal fibrosis.** The C57BL/6 mice with UUO operation were injected with MBD2-siRNA or control at 15mg/kg via the tail vein once a week. (A) Representative hematoxylin and eosin staining. (B) Masson trichrome staining shows interstitial collagen deposition (blue). (C-F) Immunohistochemistry staining of FN, Col I&IV, and α-SMA. (G) Quantify tubulointerstitial fibrosis in the kidney cortex. (H) Quantification of immunohistochemistry staining. (I) Representative immunoblots for the expression of FN, Col I&IV, α-SMA, EGR1, MBD2, and GAPDH. (J) Densitometry analysis of proteins signals, and normalized to internal control of GAPDH. Data are expressed as means ± sd (n=6). #  $P < 0.05$  versus sham group. \* $P < 0.05$  versus Control with UUO group. Original magnification, x400. Scale Bar: 100μm.

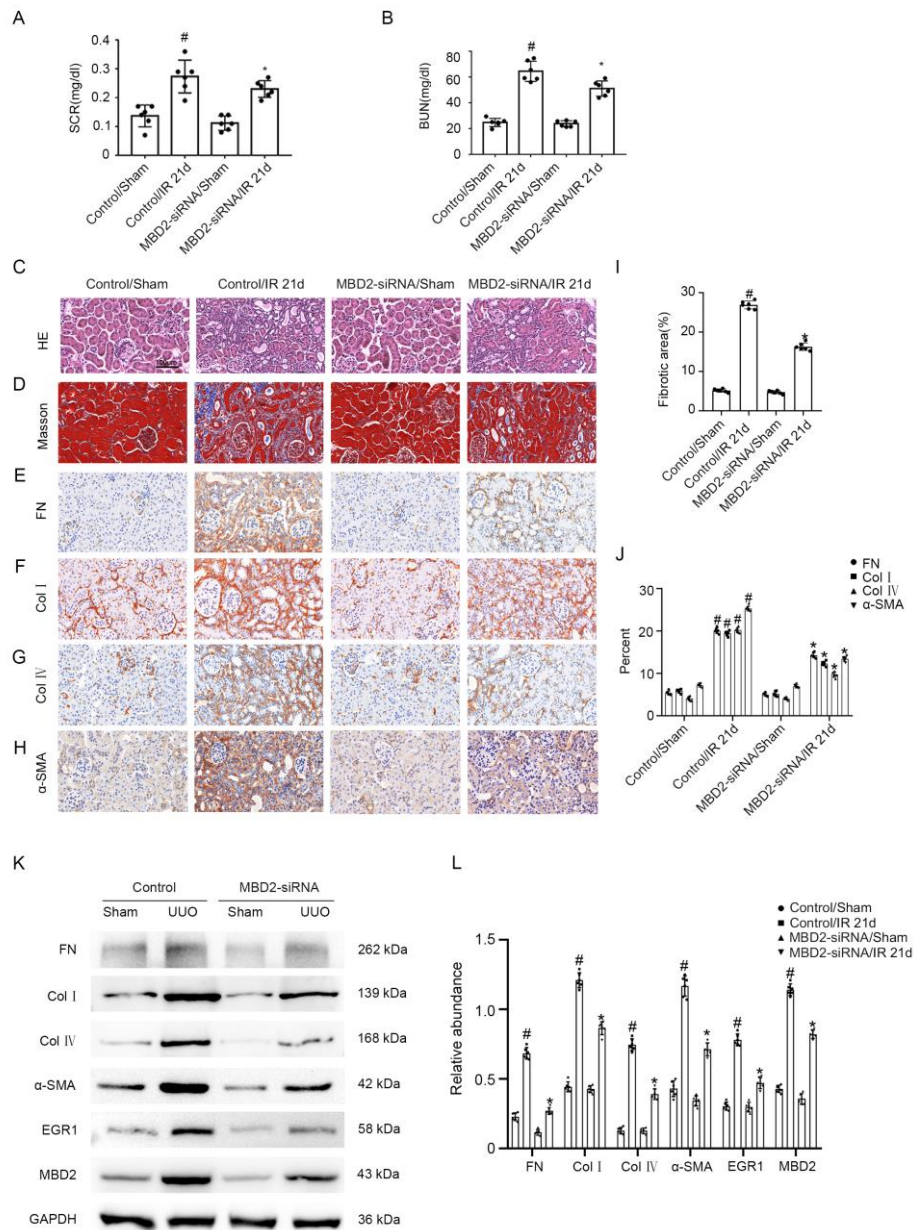

**Supplemental Figure 3. MBD2 siRNA attenuated IR-induced renal fibrosis.** The C57BL/6 mice with IR operation were injected with MBD2-siRNA or control at 15mg/kg via the tail vein once a week. (A) Blood SCR level of mice. (B) Blood BUN level of mice. (C) Representative hematoxylin and eosin staining. (D) Masson trichrome staining shows interstitial collagen deposition (blue). (E-H) Immunohistochemistry of FN, Col I&IV, and  $\alpha$ -SMA. (I) Quantify tubulointerstitial fibrosis in the kidney cortex. (J) Quantification of immunohistochemistry staining. (K) Representative immunoblots for the expression of FN, Col I&IV,  $\alpha$ -SMA, EGR1 and GAPDH. (L) Densitometry analysis of proteins signals, and normalized to internal control of GAPDH. Data are expressed as means  $\pm$  sd (n=6). #  $P < 0.05$  versus sham group. \*  $P < 0.05$  versus Control with IR group. Original magnification, x400. Scale Bar: 100 $\mu$ m.



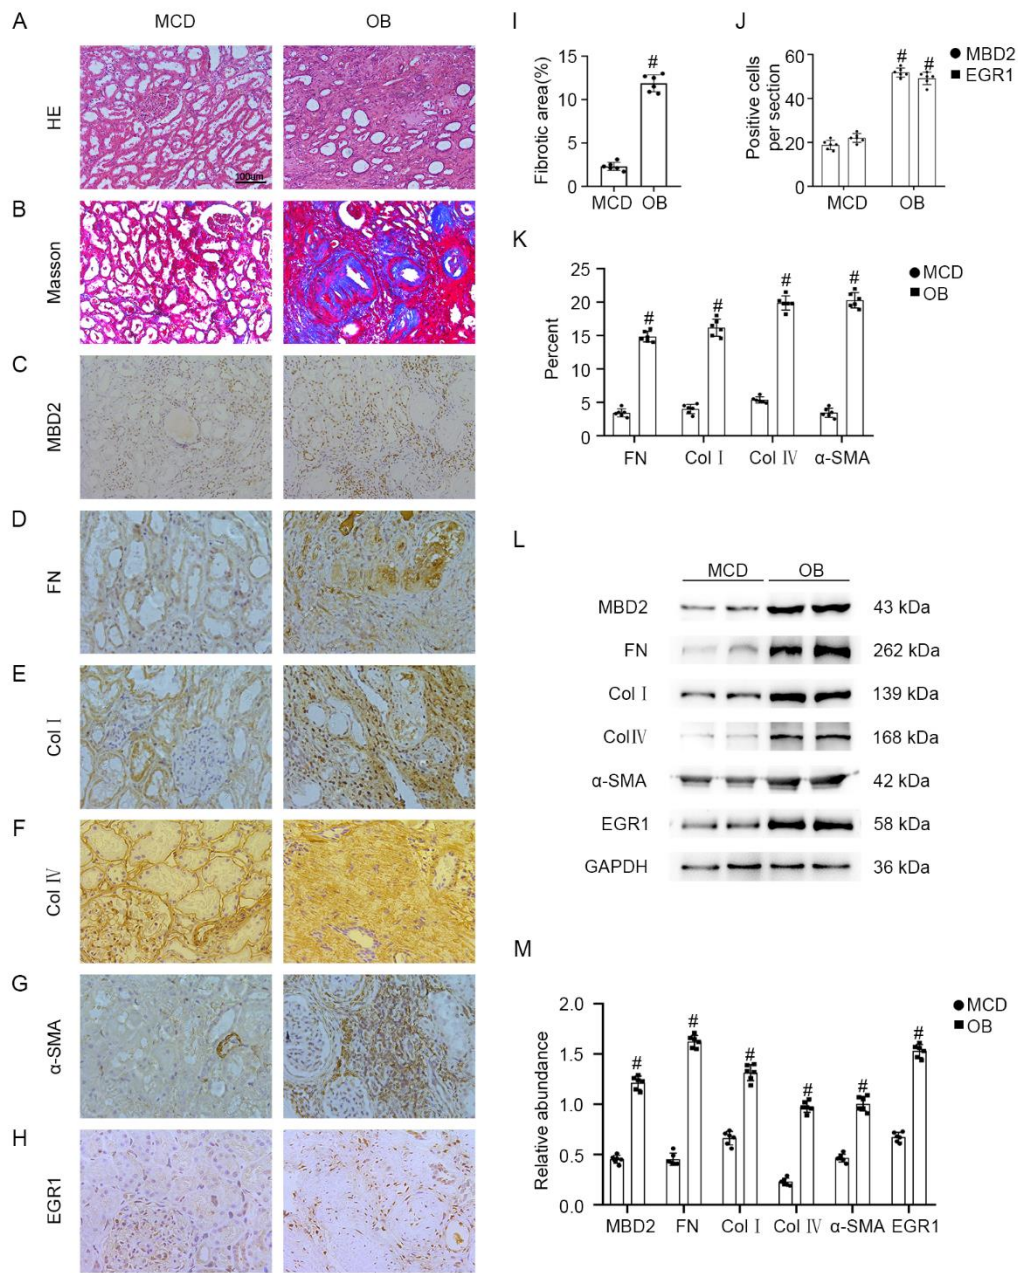

**Supplemental Figure 4. MBD2-induced downstream genes expression in patients with OB.**

The samples of kidneys from OB patients were gathered. (A) Representative hematoxylin and eosin staining. (B) Masson trichrome staining shows interstitial collagen deposition (blue). (C-H) Representative immunohistochemistry staining of MBD2, ECM related genes, and EGR1. (I) Quantification of the tubulointerstitial fibrosis. (J&K) Quantification of immunohistochemistry staining (L) Representative immunoblot of MBD2, ECM related genes and EGR1. (M) Densitometry analysis of proteins signals, and normalized to internal control of GAPDH. Data are expressed as means  $\pm$  sd (n=6). # P<0.05 versus MCD group. Original magnification, x400. Scale Bar: 100 $\mu$ m.

MBD2 plasmid map

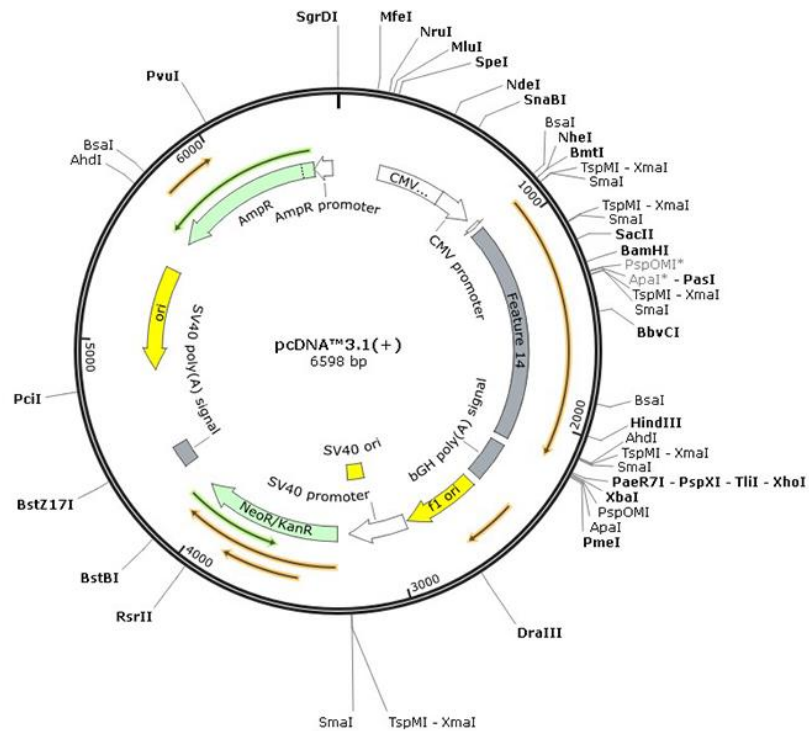

**Supplemental Figure 5. The Map of MBD2 plasmid.** The sequences listed as below:  
GACGGATCGGGAGATCTCCCGATCCCCTATGGTGC ACTCTCAGTACAATC  
TGCTCTGATGCCGCATAGTTAAGCCAGTATCTGCTCCCTGCTTGTGTGTTG  
GAGGTCGCTGAGTAGTGCGCGAGCAAAATTTAAGCTACAACAAGGCAAG  
GCTTGACCGACAATTGCATGAAGAATCTGCTTAGGGTTAGGCGTTTTGCG  
CTGCTTCGCGATGTACGGGCCAGATATACGCGTTGACATTGATTATTGACT  
AGTTATTAATAGTAATCAATTACGGGGTCATTAGTTCATAGCCCATATATG  
GAGTTCGCGTTACATAACTTACGGTAAATGGCCCGCCTGGCTGACCGCC  
CAACGACCCCGCCATTGACGTCAATAATGACGTATGTTCCCATAGTAA  
CGCCAATAGGGACTTTCATTGACGTCAATGGGTGGAGTATTTACGGTAA  
ACTGCCCACTTGGCAGTACATCAAGTGTATCATATGCCAAGTACGCCCCCT  
ATTGACGTCAATGACGGTAAATGGCCCGCCTGGCATTATGCCCAGTACAT  
GACTTTATGGGACTTTCCTACTTGGCAGTACATCTACGTATTAGTCATCGC  
TATTACCATGGTGATGCGGTTTTGGCAGTACATCAATGGGCGTGGATAGC  
GGTTTGACTCACGGGGATTCCAAGTCTCCACCCATTGACGTCAATGGG  
AGTTTGT TTTGGCACCAAAATCAACGGGACTTTC AAAATGTCGTAACAA  
CTCCGCCCCATTGACGCAAATGGGCGGTAGGCGTGTACGGTGGGAGGTCT  
ATATAAGCAGAGCTCTCTGGCTAACTAGAGAACCCACTGCTTACTGGCTT

ATCGAAATTAATACGACTCACTATAGGGAGACCCAAGCTGGCTAGCgccacc  
ATGCGCGCGCACCCGGGGGGAGGCCGCTGCTGCCCCGAGCAGGAGGAGG  
GGGAGAGCGCGGGCGGGCGGCAGCGGCGCTGGCGGCGACTCCGCCATAGA  
GCAGGGGGGGCCAGGGCAGCGCGCTCGCTCCGTCCCCGGTGAGCGGCGTGC  
GCAGGGAAGGCGCTCGGGGCGGGCGGCCGTGGCCGGGGGGCGGTGGAAGCA  
GGCGGCCCGGGGCGGGCGGCGTCTGTGGCCGTGGCCGTGGCCGTGGCCGGG  
GTCGGGGCCGTGGCCGGGGCCGGGGCCGGGGCCGCGGCCGTCCCCAGAG  
TGGCGGCAGCGGCCTTGGCGGGCAGCGGCGGCGGGCGGCGGGCGGGCTGC  
GGCGGGCGGACGGGTGGCGGCGTCGCCCCCGGCGGGATCCTGTCCCTTT  
CCCGTCGGGGAGCTCGGGGCCGGGGCCCAGGGGACCCCGGGCCACGGAG  
AGCGGGAAGAGGATGGACTGCCCGGCCCTCCCCCGGATGGAAGAAGG  
AGGAAGTGATCCGAAAATCAGGGCTCAGTGCTGGCAAGAGCGATGTCTAC  
TACTTCAGTCCAAGTGGTAAGAAGTTCAGAAGTAAACCTCAGCTGGCAAG  
ATACCTGGGAAATGCTGTTGACCTTAGCAGTTTTGACTTCAGGACCGGCA  
AGATGATGCCTAGTAAATTACAGAAGAACAAGCAGAGACTCCGGAATGA  
CCCCCTCAATCAGAACAAGGGTAAACCAGACCTGAACACAACATTGCCAA  
TTAGACAAACTGCATCAATTTTCAAGCAACCAGTAACCAAATTCACGAAC  
CACCCGAGCAATAAGGTGAAGTCAGACCCCCAGCGGATGAATGAACAAC  
CACGTCAGCTTTTCTGGGAGAAGAGGCTACAAGGACTTAGCGCATCAGAT  
GTAACAGAACAAATTATAAAAACCATGGAGCTACCTAAAGGTCTTCAAGG  
AGTCGGTCCAGGTAGCAATGACGAGACCCTTCTGTCTGCTGTGGCCAGTG  
CTTTACACACAAGCTCTGCGCCATCACAGGACAAGTCTCTGCTGCCGTG  
GAAAAGAACCCTGCTGTTTGGCTTAACACATCTCAACCCCTCTGCAAAGC  
TTTCATTGTTACAGATGAAGACATTAGGAAACAGGAAGAGCGAGTCCAAC  
AAGTACGCAAGAACTGGAGGAGGCACTGATGGCCGACATCCTGTCCCG  
GGCTGCGGACACGGAGGAAGTAGACATTGACATGGACAGTGGAGATGAG  
GCGTAACTCGAGTCTAGAGGGCCCGTTTAAACCCGCTGATCAGCCTCGAC  
TGTGCCTTCTAGTTGCCAGCCATCTGTTGTTTGGCCCTCCCCCGTGCCTTCC  
TTGACCCTGGAAGGTGCCACTCCCACTGTCCTTTTCTAATAAAATGAGGA  
AATTGCATCGCATTGTCTGAGTAGGTGTCATTCTATTCTGGGGGGTGGGGT  
GGGGCAGGACAGCAAGGGGGAGGATTGGGAAGACAATAGCAGGCATGCT  
GGGGATGCGGTGGGCTCTATGGCTTCTGAGGCGGAAAGAACCAGCTGGG  
GCTCTAGGGGGTATCCCCACGCGCCCTGTAGCGGCGCATTAAAGCGCGGCG  
GGTGTGGTGGTTACGCGCAGCGTGACCGCTACACTTGCCAGCGCCCTAGC  
GCCCCGCTCCTTTCGCTTTTCTTCCCTTCCCTTCTCGCCACGTTTCGCCGGCTTT  
CCCCGTCAAGCTCTAAATCGGGGGCTCCCTTTAGGGTTCCGATTTAGTGCT  
TTACGGCACCTCGACCCCAAAAACTTGATTAGGGTGATGGTTCACGTAG  
TGGGCCATCGCCCTGATAGACGGTTTTTTCGCCCTTTGACGTTGGAGTCCAC  
GTTCTTTAATAGTGGACTCTTGTTCCAAACTGGAACAACACTCAACCCTAT  
CTCGGTCTATTCTTTTATTATAAGGGATTTTGCCGATTTTCGGCCTATTGG  
TTAAAAAATGAGCTGATTTAACAAAAATTTAACGCGAATTAATTCTGTGG  
AATGTGTGTCAGTTAGGGTGTGGAAAGTCCCCAGGCTCCCCAGCAGGCAG

AAGTATGCAAAGCATGCATCTCAATTAGTCAGCAACCAGGTGTGGAAAGT  
CCCCAGGCTCCCCAGCAGGCAGAAGTATGCAAAGCATGCATCTCAATTAG  
TCAGCAACCATAGTCCCGCCCCTAACTCCGCCCATCCCGCCCCTAACTCCG  
CCCAGTTCCGCCCATTCTCCGCCCATGGCTGACTAATTTTTTTTATTTATG  
CAGAGGCCGAGGCCGCCTCTGCCTCTGAGCTATTCCAGAAGTAGTGAGGA  
GGCTTTTTTGGAGGCCTAGGCTTTTGCAAAAAGCTCCCGGGAGCTTGTATA  
TCCATTTTCGGATCTGATCAAGAGACAGGATGAGGATCGTTTCGCATGATT  
GAACAAGATGGATTGCACGCAGGTTCTCCGGCCGCTTGGGTGGAGAGGCT  
ATTCGGCTATGACTGGGCACAACAGACAATCGGCTGCTCTGATGCCGCCG  
TGTTCCGGCTGTCAGCGCAGGGGCGCCCGTTCTTTTTGTCAAGACCGACC  
TGTCGGTGCCTGAATGAACTGCAGGACGAGGCAGCGCGGCTATCGTGG  
CTGGCCACGACGGGCGTTCCCTGCGCAGCTGTGCTCGACGTTGTCACTGA  
AGCGGGAAGGGACTGGCTGCTATTGGGCGAAGTGCCGGGGCAGGATCTC  
CTGTCATCTCACCTTGCTCCTGCCGAGAAAGTATCCATCATGGCTGATGCA  
ATGCGGCGGCTGCATACGCTTGATCCGGCTACCTGCCCATTCGACCACCA  
AGCGAAACATCGCATCGAGCGAGCACGTA CTGGATGGAAGCCGGTCTTG  
TCGATCAGGATGATCTGGACGAAGAGCATCAGGGGCTCGCGCCAGCCGA  
ACTGTTCCGCCAGGCTCAAGGCGCGCATGCCCGACGGCGAGGATCTCGTCG  
TGACCCATGGCGATGCCTGCTTGCCGAATATCATGGTGGAAAATGGCCGC  
TTTTCTGGATTCATCGACTGTGGCCGGCTGGGTGTGGCGGACCGCTATCAG  
GACATAGCGTTGGCTACCCGTGATATTGCTGAAGAGCTTGGCGGCGAATG  
GGCTGACCGCTTCCTCGTGCTTTACGGTATCGCCGCTCCCGATTCGCAGCG  
CATCGCCTTCTATCGCCTTCTTGACGAGTTCTTCTGAGCGGGACTCTGGGG  
TTCGAAATGACCGACCAAGCGACGCCAACCTGCCATCACGAGATTTCGA  
TTCCACCGCCGCTTCTATGAAAGGTTGGGCTTCGGAATCGTTTTCCGGGA  
CGCCGGCTGGATGATCCTCCAGCGCGGGGATCTCATGCTGGAGTTCTTCG  
CCCACCCCAACTTGTTTATTGCAGCTTATAATGGTTACAAATAAAGCAATA  
GCATCACAAATTTACAAATAAAGCATTTTTTTCACTGCATTCTAGTTGTG  
GTTTGTCCAAACTCATCAATGTATCTTATCATGTCTGTATAACCGTCGACCT  
CTAGCTAGAGCTTGGCGTAATCATGGTCATAGCTGTTTCCTGTGTGAAATT  
GTTATCCGCTCACAATTCACACAACATACGAGCCGGAAGCATAAAGTGT  
AAAGCCTGGGGTGCCTAATGAGTGAGCTAACTCACATTAATTGCGTTGCG  
CTCACTGCCCGCTTTCAGTCGGGAAACCTGTCGTGCCAGCTGCATTAATG  
AATCGGCCAACGCGCGGGGAGAGGCGGTTTTCGTATTGGGCGCTCTTCCG  
CTTCTCGCTCACTGACTCGCTGCGCTCGGTTCGTTCCGGCTGCGGCGAGCGG  
TATCAGCTCACTCAAAGGCGGTAATACGGTTATCCACAGAATCAGGGGAT  
AACGCAGGAAAGAACATGTGAGCAAAAGGCCAGCAAAAGGCCAGGAACC  
GTAAAAGGCCGCGTTGCTGGCGTTTTTCCATAGGCTCCGCCCCCTGACG  
AGCATCACAAAATCGACGCTCAAGTCAGAGGTGGCGAAACCCGACAGG  
ACTATAAAGATAACCAGGCGTTTTCCCCTGGAAGCTCCCTCGTGCGCTCTCC  
TGTTCCGACCCTGCCGCTTACCGGATACCTGTCCGCCTTCTCCCTTCGGG  
AAGCGTGGCGCTTCTCATAGCTCACGCTGTAGGTATCTCAGTTCGGTGTA



GGTCGTTTCGCTCCAAGCTGGGCTGTGTGCACGAACCCCCCGTTCAGCCCG  
ACCGCTGCGCCTTATCCGGTAACTATCGTCTTGAGTCCAACCCGGTAAGAC  
ACGACTTATCGCCACTGGCAGCAGCCACTGGTAACAGGATTAGCAGAGCG  
AGGTATGTAGGCGGTGCTACAGAGTTCTTGAAGTGGTGGCCTAACTACGG  
CTACACTAGAAGAACAGTATTTGGTATCTGCGCTCTGCTGAAGCCAGTTA  
CCTTCGGAAAAAGAGTTGGTAGCTCTTGATCCGGCAAACAAACCACCGCT  
GGTAGCGGTGGTTTTTTTTGTTTGCAAGCAGCAGATTACGCGCAGAAAAAA  
AGGATCTCAAGAAGATCCTTTGATCTTTTCTACGGGGTCTGACGCTCAGTG  
GAACGAAAACCTCACGTAAAGGGATTTTGGTCATGAGATTATCAAAAAGGA  
TCTTCACCTAGATCCTTTTAAATTA AAAATGAAGTTTTAAATCAATCTAAA  
GTATATATGAGTAAACTTGGTCTGACAGTTACCAATGCTTAATCAGTGAG  
GCACCTATCTCAGCGATCTGTCTATTTTCGTTTCATCCATAGTTGCCTGACTC  
CCCGTCGTGTAGATAACTACGATACGGGAGGGCTTACCATCTGGCCCCAG  
TGCTGCAATGATAACCGCGAGACCCACGCTCACCGGCTCCAGATTTATCAG  
CAATAAACCAGCCAGCCGGAAGGGCCGAGCGCAGAAGTGGTCTGCAAC  
TTTATCCGCCTCCATCCAGTCTATTAATTGTTGCCGGGAAGCTAGAGTAAG  
TAGTTCGCCAGTTAATAGTTTGCACAACGTTGTTGCCATTGCTACAGGCAT  
CGTGGTGTACGCTCGTCGTTTGGTATGGCTTCATTCAGCTCCGGTTCCCA  
ACGATCAAGGCGAGTTACATGATCCCCATGTTGTGCAAAAAAGCGGTTA  
GCTCCTTCGGTCTCCGATCGTTGTCAGAAGTAAGTTGGCCGCAGTGTTAT  
CACTCATGGTTATGGCAGCACTGCATAATTCTCTTACTGTCATGCCATCCG  
TAAGATGCTTTTTCTGTGACTGGTGAGTACTCAACCAAGTCATTCTGAGAAT  
AGTGTATGCGGCGACCGAGTTGCTCTTGCCCGGCGTCAATACGGGATAAT  
ACCGCGCCACATAGCAGAACTTTAAAAGTGCTCATCATTGGAAAACGTTT  
TTCGGGGCGAAAACCTCAAGGATCTTACCGCTGTTGAGATCCAGTTCCGA  
TGTAACCACTCGTGCACCCAACCTGATCTTCAGCATCTTTTACTTTACCA  
GCGTTTCTGGGTGAGCAAAAACAGGAAGGCAAAATGCCGCAAAAAGGG  
AATAAGGGCGACACGGAAATGTTGAATACTCATACTCTTCTTTTTCAATA  
TTATTGAAGCATTATCAGGGTTATTGTCTCATGAGCGGATACATATTTGA  
ATGTATTTAGAAAAATAAACAAATAGGGGTTCCGCGCACATTTCCCCGAA  
AAGTGCCACCTGACGTC.
